# Supplementary material
Source: PubMed Central journal article supplement (PMC5518559)
Supplement: jciinsight-2-92634-s001.pdf [file jciinsight-2-92634-s001.pdf]

## Supporting Materials

### ER stress-dependent release of mitochondrial DNA enriched microparticles contributes to acute-on-chronic alcoholic neutrophilia and hepatotoxicity

Yan Cai,<sup>1\*</sup> Ming-Jiang Xu,<sup>1\*</sup> Erik H. Koritzinsky,<sup>2</sup> Zhou Zhou,<sup>1</sup> Wei Wang,<sup>1</sup> Haixia Cao,<sup>1</sup> Peter S.T. Yuen,<sup>2</sup> Ruth A. Ross<sup>3</sup>, Robert A. Star,<sup>2</sup> Suthat Liangpunsakul<sup>3,4</sup>, Bin Gao<sup>1</sup>

Supplemental Table 1: Primer sequences for real-time PCR.

| Genes           | Forward primer (5'-3') | Reverse primer (5'-3') |
|-----------------|------------------------|------------------------|
| <i>Bcl-xl</i>   | GCTGCATTGTTCCCGTAGAG   | GTTGGATGGCCACCTATCTG   |
| <i>Bcl2</i>     | GGTCTTCAGAGACAGCCAGG   | GATCCAGGATAACGGAGGCT   |
| <i>Bak</i>      | AGACCTCCTCTGTGTCCTGG   | AAAATGGCATCTGGACAAGG   |
| <i>Bax</i>      | GATCAGCTCGGGCACTTTAG   | TTGCTGATGGCAACTTCAAC   |
| <i>Bim</i>      | GCTCCTGTGCAATCCGTATC   | GCCCCTACCTCCCTACAGAC   |
| <i>Dr5</i>      | GGTCCTCTTGATGGGCTCTC   | GTTGCTGCTTGCTGTGCTAC   |
| <i>Trail-r2</i> | GGTCCTCTTGATGGGCTCTC   | GTTGCTGCTTGCTGTGCTAC   |
| <i>Chop</i>     | GACCAGTTTCTGCTTTCAGG   | CAGCGACAGAGCCAGAATAA   |
| <i>Ero1a</i>    | CACAGGTACAGTCGTCCAGGT  | CTTGCTCGTTGGACTCCTG    |
| <i>Ero1b</i>    | TGACAAAAAGGGGGCCAAGT   | TATCGCACCCAACACAGTCC   |
| <i>Pdi</i>      | CCCCGTGTGTGGAAAAGAGA   | AGCCACAGAGTAATGTGCC    |
| <i>Gadd34</i>   | GGAGATAGAAGTTGTGGGCG   | TTTTGGCAACCAGAACCG     |
| <i>Grp78</i>    | ATCTTTGGTTGCTTGTCGCT   | ATGAAGGAGACTGCTGAGGC   |
| <i>Casp1</i>    | TGGAAATGTGCCATCTTCTTT  | TCAGCTCCATCAGCTGAAAC   |
| <i>Nlrp3</i>    | AAGTAAGGCCGGAATTCACC   | AAAATGCCTTGGGAGACTCA   |
| <i>IL-1β</i>    | TCGCTCAGGGTCACAAGAAA   | CATCAGAGGCAAGGAGGAAAAC |
| <i>Ccl2</i>     | ATTGGGATCATCTTGCTGGT   | CCTGCTGTTACAGTTGCC     |
| <i>Ccl3</i>     | GTGGAATCTTCCGGCTGTAG   | ACCATGACACTCTGCAACCA   |
| <i>Ccl4</i>     | GAAACAGCAGGAAGTGGGAG   | CATGAAGCTCTGCGTGTCTG   |
| <i>Cxcl1</i>    | TCTCCGTTACTTGGGGACAC   | CCCACTCAAGAATGGTCGC    |

|                 |                           |                            |
|-----------------|---------------------------|----------------------------|
| <i>Cxcl10</i>   | CCTATGGCCCTCATTCTCAC      | CTCATCCTGCTGGGTCTGAG       |
| <i>Cxcl12</i>   | TTTCAGATGCTTGACGTTGG      | GCGCTCTGCATCAGTGAC         |
| <i>Cer1</i>     | TGCTGAGGAACTGGTCAGG       | AGGCCAGAAACAAAGTCTG        |
| <i>Cer2</i>     | AGCACATGTGGTGAATCCAA      | TGCCATCATAAAGGAGCCA        |
| <i>Cer3</i>     | CATAGGGTGTGGTCTCAAAGC     | AAAGGACTTAGCAAAATTCACCA    |
| <i>Cer5</i>     | GCAGGGTGCTGACATACCAT      | ATCCGTTCCCCCTACAAGAG       |
| <i>Cxcr5</i>    | TCCTGTAGGGGAATCTCCGT      | ACTAACCCCTGGACATGGGC       |
| <i>Cxcr6</i>    | AAATCTCCCTCGTAGTGCCC      | TGGAACAAAGCTACTGGGCT       |
| <i>IL-6</i>     | ACAAGTCGGAGGCTTAATTACACAT | TTGCCATTGCACAACTCTTTTC     |
| <i>IL-4</i>     | CGAGCTCACTCTCTGTGGTG      | TGAACGAGGTCACAGGAGAA       |
| <i>TNF-a</i>    | AGGCTGCCCCGACTACGT        | GACTTTCTCCTGGTATGAGATAGCAA |
| <i>Tnfr1</i>    | ATGGATGTATCCCCATCAGC      | AATGGGGGAGTGAGAGGC         |
| <i>Tnfr2</i>    | AGATCTGGCACTCGTACCCA      | GTCTTCGAACTGCAGCTGTG       |
| <i>Tnfrsf21</i> | GGCGTTGCAAAGAAACTGAT      | TGGATCTACTACCGCAACGG       |
| <i>Ifnr</i>     | TAGCCAAGACTGTGATTGCGG     | AGACATCTCCTCCCATCAGCAG     |
| <i>Pai1</i>     | GCCAGGGTTGCACTAAACAT      | GCCTCCTCATCCTGCCTAA        |
| <i>Tlr4</i>     | TGTCATCAGGGACTTTGCTG      | TGTTCTTCTCCTGCCTGACA       |
| <i>Selp</i>     | GGACACTTGATGGCTTCACA      | CAGTTCATGTGCGATGAAGG       |
| <i>Icam1</i>    | CAATTTCTCATGCCGCACAG      | AGCTGGAAGATCGAAAGTCCG      |
| <i>Vcam1</i>    | TCGGGCGAAAAATAGTCCTT      | CCGGCATATACGAGTGTGAA       |
| <i>F4/80</i>    | CTTTGGCTATGGGCTTCCAGTC    | GCAAGGAGGACAGAGTTTATCGTG   |
| <i>Tgfb</i>     | CAACCCAGGTCCTTCCTAAA      | GGAGAGCCCTGGATACCAAC       |

## Supporting Figure 1

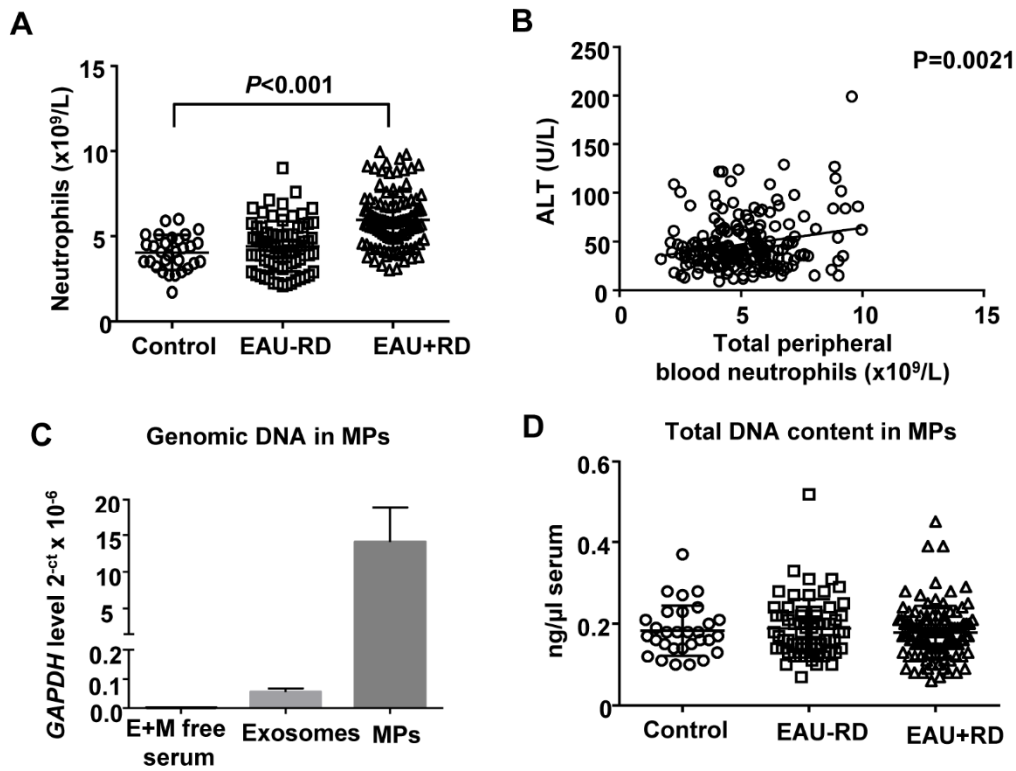

**Supporting Figure 1: The number of PMN, the correlation of PMN and ALT, and the total DNA content in MPs.** (A) The number of total PMN in healthy controls, EAU-RD, and EAU+RD patients. (B) The correlation between the number of PMN and serum ALT. (C) Serum exosomes and MPs were isolated from EAU+RD sera, and total DNA in the exosomes, MPs and the EVs free serum were extracted. Genomic DNA contents were assessed by checking *GAPDH* DNA level. (D) Total DNA contents in serum MPs.

## Supporting Figure 2

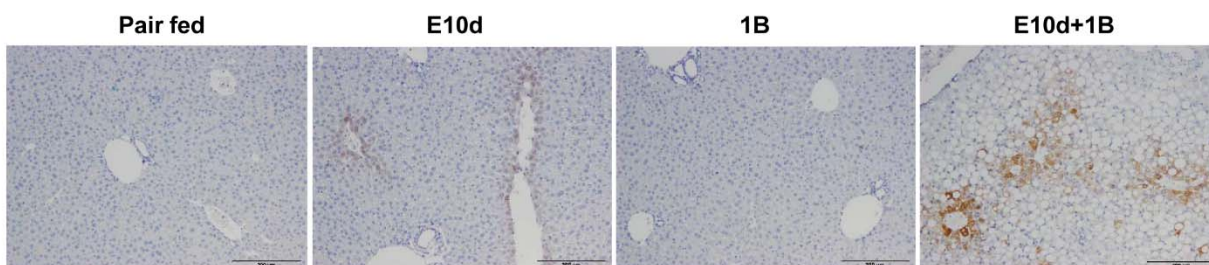

**Supporting Figure 2: E10d+1B upregulates hepatic CHOP protein expression.** C57B6J mice were subjected to pair fed, chronic (E10d), one binge (1B), and E10d+1B feeding. Liver tissues were subjected to immunostaining with an anti-CHOP antibody. Representative immunostaining images are shown.

## Supporting Figure 3

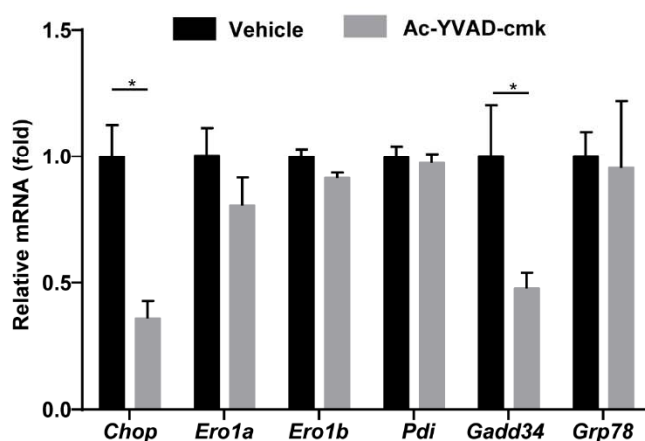

**Supporting Figure 3: The role of caspase-1 inhibitor on ER stress-related gene expression in E10d+1B mice.** Female C57BL/6J mice were undergone E10d+1B. Real-time PCR analyzed ER stress-related gene expression in the liver tissue. \* $P < 0.05$ .  $n = 5$
